# Supplementary material
Source: ML conference proceedings conference paper supplement (https://openreview.net/forum?id=OidS05t1po1)
Supplement: supplementary_material [file attachment]

# Appendix for the paper entitled *Improving Exploration in Deep Reinforcement Learning by State Planning Policies*

## A Appendix

Videos visualizing the trained agents, and link to the git software repository with SPP-RL algorithms implementations are available online <https://sites.google.com/view/spprl>.

## B SPP-RL Algorithm Details

### B.1 Lagrangian Optimization

To solve the constrained optimization problem we use the idea of Lagrange multipliers going back to the classical calculus. Lagrange multipliers were already applied in the RL context in [25], where authors developed on-policy RL algorithms for safety RL. This method uses an adaptive penalty coefficient to enforce constraints. We find this method plausible, as it translates a constrained objective into solving a classical max-min problem that can be incorporated within any RL algorithm. The max-min Lagrangian objective  $\mathcal{L}(\pi, \lambda)$  for the constrained optimization problem (1) takes the form

$$\max_{\pi} \min_{\lambda \geq 0} \mathcal{L}(\pi, \lambda) = \mathbb{E}_{\tau \sim \pi} [R_0(\pi)] - \lambda \left( \mathbb{E}_{\mathcal{D}} \left[ \|s_{t+1} - z_t\|_2^2 \middle| z_t \sim \pi(s_t) \right] - d \right). \quad (2)$$

Intuitively, when the constraint (1b) is satisfied, then the min w.r.t.  $\lambda$  is attained for  $\lambda = 0$ , and causes  $\lambda$  to decrease. On the other hand, if the constraint is not satisfied, then the min is attained for  $\lambda = \infty$ , and hence causing  $\lambda$  to increase, the constraint satisfaction receives more weight in the overall max-min objective, eventually forcing the constraint to be fulfilled.

We solve the max-min Lagrangian objective for SPP policy using simultaneous gradient ascent w.r.t. the policy parameters  $\theta$ , descent w.r.t. the Lagrange multiplier  $\lambda$ , updates. Such an approach can be viewed as an instance of a primal-dual algorithm for constrained MDP. It is known in the literature that time-steps of Actor, Critic & dual variable gradient updates should be adjusted separately to guarantee convergence. The SPP algorithms use three learning rates: actor ( $l_\theta$ ), critic ( $l_\phi$ ), and dual variable ( $l_\lambda$ ), which were adjusted using a hyper-parameter optimization. The actor and critic learning rates were equal in all of the studied algorithms, whereas the dual variable was fixed in all algorithms to  $l_\lambda = 0.0001$ .

### B.2 SPP-SAC Algorithm

The original DDPG algorithm, which is the base of SPP-DDPG presented in Algorithm 1 aims at training a deterministic policy, as contrary to for example SAC algorithm by [11, 12] that trains a stochastic policy. Its main principle is rooted in the very successful deep  $Q$ -learning method, originally applied for solving the Atari benchmark problem [20]. However, DDPG is suitable for continuous action spaces like in the MuJoCo tasks. SAC is an algorithm that combines ideas of DDPG and soft  $Q$ -learning [10] utilizing the advantages of both approaches, SPP-SAC is presented in Algorithm 2.

### B.3 SPP-TD3 Algorithm

Twin Delayed Policy Gradient (TD3) [8] is an improved DDPG algorithm using several tricks, which can be summarized as Clipped Double-Q Learning, Delayed Policy Updates, Target Policy Smoothing. SPP-TD3 algorithm is presented in Algorithm 3.

## C Hyperparameters Used in Experiments

We present hyper-parameters used in our experiments in Table 2 for the SPP-DDPG, in Table 6 for the SPP-SAC. SPP-TD3 hyper-parameters were dependent on the set of benchmarks, and

---

**Algorithm 2: SPP-SAC Algorithm**


---

```

repeat
  Sample random action  $a \sim \mathcal{U}$ ;
  Store experience  $(s_t, z_t, a_t, s_{t+1}, r_t)$  in  $\mathcal{D}$ ; (use next-state as the initial actor actions)
until random exploration is done;
repeat
  if buffer  $\mathcal{D}$  is not full then
    Sample actor prediction  $z_t \sim \pi(s_t)$ ;
    Compute action  $a_t = \text{CM}(s_t, z_t)$ ;
    Observe reward  $r_t$  and next state  $s_{t+1}$ ;
    Store experience  $(s_t, z_t, a_t, s_{t+1}, r_t)$  in  $\mathcal{D}$ ;
    If  $s_{t+1}$  is terminal, reset environment state;
  end
  if it's time to update CM then
    Randomly sample  $\{b_i = \{(s_t, s_{t+1}), a_t\}\}_{i=1}^n$   $n$  batches of samples from replay buffer  $\mathcal{D}$ ;
    SGD train CM using the batches and MSE loss;
  end
  if it's time to update actor and critic then
    for update steps do
      Randomly sample  $\mathcal{B} = \{(s_t, z_t, a_t, s_{t+1}, r_t)\}$  set of batches from  $\mathcal{D}$ ;
      Compute actions  $\hat{a}_{t+1} = \text{CM}(s_{t+1}, \hat{z}_{t+1})$ , using samples  $\hat{z}_{t+1} \sim \pi(z_{t+1}|s_{t+1})$ ;
      Compute targets  $y = r_t + \gamma \min_{i=1,2} Q_{\phi_{\text{target},i}}^{\pi, \text{CM}}(s_{t+1}, \hat{a}_{t+1})$ ;

      Compute  $\phi = \phi - l_\phi \cdot \nabla_\phi \frac{1}{|\mathcal{B}|} \sum_{\mathcal{B}} \left( y - Q_\phi^{\pi, \text{CM}}(s_t, a_t) \right)^2$ ;
      Compute  $\theta = \theta + l_\theta \cdot \nabla_\theta \frac{1}{|\mathcal{B}|} \sum_{\mathcal{B}} \left( \min_{i=1,2} Q_\phi^{\pi, \text{CM}}(s_t, \tilde{a}_{\theta,t}(s_t)) - \alpha \log \pi_\theta(\tilde{z}_{\theta,t}(s_t)|s_t) \right)$ ,
        where  $\tilde{z}_{\theta,t}(s_t) \sim \pi(z_t|s_t)$  is differentiable wrt  $\theta$ ;
      Compute  $\theta = \theta - \frac{l_\theta \lambda}{|\mathcal{B}|} \cdot \nabla_\theta \sum_{\mathcal{B}} \|s_{t+1} - \tilde{z}_{\theta,t}(s_t)\|_2^2$ ;
      Update  $\lambda = \lambda + l_\lambda \left( \frac{1}{|\mathcal{B}|} \sum_{\mathcal{B}} \|s_{t+1} - \tilde{z}_{\theta,t}(s_t)\|_2^2 - d \right)$ ;
      Update target networks  $\phi_{\text{target},i} = (1 - \tau)\phi_{\text{target},i} + \tau\phi_i$ , for  $i = 1, 2$ ;
    end
  end
until convergence;

```

---

hyper-parameters specific for MuJoCo environments are in Tab. 3, for SafetyGym in Tab. 4, and for AntPush in Tab. 5.

In SPP-DDPG implementation we used the following architectures:

- Actor:  $\dim(\mathcal{S}) \rightarrow 256 \text{ ReLU} \rightarrow 256 \text{ ReLU} \rightarrow \dim(\mathcal{A}) \tanh$ ;
- Critic:  $\dim(\mathcal{S}) + \dim(\mathcal{A}) \rightarrow 256 \text{ ReLU} \rightarrow 256 \text{ ReLU} \rightarrow 1$ ;
- CM:  $2 \cdot \dim(\mathcal{S}) \rightarrow 100 \tanh \rightarrow 50 \tanh \rightarrow \dim(\mathcal{A}) \tanh$ ;

In SPP-TD3 implementation we used the following architectures:

- Actor:  $\dim(\mathcal{S}) \rightarrow 256 \text{ ReLU} \rightarrow 256 \text{ ReLU} \rightarrow \dim(\mathcal{A}) \tanh$ ;
- Critic:  $\dim(\mathcal{S}) + \dim(\mathcal{A}) \rightarrow 256 \text{ ReLU} \rightarrow 256 \text{ ReLU} \rightarrow 1$ ;
- CM:  $2 \cdot \dim(\mathcal{S}) \rightarrow 100 \tanh \rightarrow 50 \tanh \rightarrow \dim(\mathcal{A}) \tanh$ ;

In SPP-SAC implementation we used the following architectures:

- Actor:  $\dim(\mathcal{S}) \rightarrow 256 \text{ ReLU} \rightarrow 256 \text{ ReLU} \rightarrow \dim(\mathcal{A}) \tanh$ ;
- Critic:  $\dim(\mathcal{S}) + \dim(\mathcal{A}) \rightarrow 256 \text{ ReLU} \rightarrow 256 \text{ ReLU} \rightarrow 1$ ;
- CM:  $2 \cdot \dim(\mathcal{S}) \rightarrow 64 \tanh \rightarrow 32 \tanh \rightarrow \dim(\mathcal{A}) \tanh$ ;

---

**Algorithm 3:** SPP-TD3 Algorithm

---

**input** : environment  $E$ ; initial model parameters  $\theta, \phi_1, \phi_2, \psi$ ; state planning distance threshold  $d$ ; empty replay buffer  $\mathcal{D}$ ; TD3 algorithm hyperparameters  
**output**: trained model parameters  $\theta, \phi_1, \phi_2, \psi$ ; total return

**repeat**  
    Sample random action  $a \sim \mathcal{U}$ ;  
    Store experience  $(s_t, a_t, z_t, r_{t+1}, s_{t+1})$  in replay buffer  $\mathcal{D}$ ; (use next-state as the initial actor actions)  
**until** random exploration is done;

**repeat**  
    **if** buffer  $\mathcal{D}$  is not full **then**  
        Compute actor prediction  $z_t = \text{clip}(\pi(s_t) + \varepsilon, z_{low}, z_{high})$ , where  $\varepsilon \sim \mathcal{N}$ ;  
        Compute action  $a_t = \text{CM}(s_t, z_t)$  and observe reward  $r_{t+1}$  and next state  $s_{t+1}$ ;  
        Store experience  $(s_t, z_t, a_t, s_{t+1}, r_{t+1})$  in  $\mathcal{D}$ ;  
    **end**  
    **if** it's time to update CM **then**  
        Sample  $\{b_i = \{(s_t, s_{t+1}), a\}\}_{i=1}^b$   $b$  batches of samples from replay buffer  $\mathcal{D}$ ;  
        SGD train CM using the batches and MSE loss;  
    **end**  
    **if** it's time to update actor and critic **then**  
        **for** update steps **do**  
            Randomly sample  $\mathcal{B} = \{(s_t, z_t, a_t, s_{t+1}, r_{t+1})\}$  set of batches from  $\mathcal{D}$ ;  
            Compute target states  $\tilde{z}_{t+1}(s_{t+1}) = \text{clip}(\pi_{\theta_{targ}}(s_{t+1}) + \text{clip}(\varepsilon, -c, c), z_{low}, z_{high})$ , where  $\varepsilon \sim \mathcal{N}(0, \sigma)$ ;  
            Compute target actions  $\tilde{a}_{t+1}(s_{t+1}) = \text{CM}(s_{t+1}, \tilde{z}_{t+1}(s_{t+1}))$ ;  
            Compute targets  $y(r, s_{t+1}) = r + \gamma \min_{i=1,2} Q_{\phi_{targ,i}}^{\pi, \text{CM}}(s_{t+1}, \tilde{a}_{t+1}(s_{t+1}))$  (using target parameters  $\phi_{targ,1}, \phi_{targ,2}$ );  
            Update  $\phi_1 = \phi_1 - \frac{l_\phi}{|\mathcal{B}|} \cdot \nabla_{\phi_1} \sum_{\mathcal{B}} \left( y(r, s_{t+1}) - Q_{\phi_1}^{\pi, \text{CM}}(s_t, a_t) \right)^2$ ;  
            Update  $\phi_2 = \phi_2 - \frac{l_\phi}{|\mathcal{B}|} \cdot \nabla_{\phi_2} \sum_{\mathcal{B}} \left( y(r, s_{t+1}) - Q_{\phi_2}^{\pi, \text{CM}}(s_t, a_t) \right)^2$ ;  
            **if** current\_step mod policy\_delay = 0 **then**  
                Update  $\theta = \theta +$   
                 $l_\theta \left( \frac{1}{|\mathcal{B}|} \cdot \nabla_\theta \sum_{\mathcal{B}} Q_{\phi}^{\pi, \text{CM}}(s_t, a_t) \Big|_{a_t = \text{CM}(s_t, \pi_\theta(s_t))} - \frac{\lambda}{|\mathcal{B}|} \cdot \nabla_\theta \sum_{\mathcal{B}} \|s_{t+1} - \pi_\theta(s_t)\|_2^2 \right)$ ;  
                Update  $\lambda = \lambda + l_\lambda \left( \frac{1}{|\mathcal{B}|} \sum_{\mathcal{B}} \|s_{t+1} - \pi_\theta(s_t)\|_2^2 - d \right)$ ;  
                Update actor & critics  $\phi_{targ,i} = (1 - \tau)\phi_{targ,i} + \tau\phi_i$ ;  $\theta_{targ} = (1 - \tau)\theta_{targ} + \tau\theta$ ;  
            **end**  
        **end**  
    **end**  
**until** convergence;

---

| Hyperparameter                                 | Value                            |
|------------------------------------------------|----------------------------------|
| $\gamma$                                       | 0.99                             |
| $\tau$                                         | 0.005                            |
| actor/critic learning rate $l_\phi = l_\theta$ | 0.0005                           |
| $\lambda$ learning rate $l_\lambda$            | 0.0001                           |
| episode length                                 | 5000                             |
| batch size                                     | 100                              |
| test episodes                                  | 10                               |
| update freq. & grad.steps.                     | 50                               |
| exploration noise param.                       | 0.05                             |
| replay buffer size                             | same as number of env. interacts |
| parameters specific for SPP-DDPG               |                                  |
| $d$ state consistency                          | 0.2                              |
| CM hyper-parameters                            |                                  |
| init. rand. samples                            | 20000                            |
| learning rate                                  | 0.005                            |
| batch size                                     | 128                              |
| update frequency                               | 500 steps                        |
| update epochs                                  | 1                                |
| update batches                                 | 100                              |

Table 2: SPP-DDPG Algorithm hyperparameters, DDPG used the same hyperparameters, except exploration noise (set to 0.1).

| Hyperparameter                                 | Value                            |
|------------------------------------------------|----------------------------------|
| $\gamma$                                       | 0.99                             |
| $\tau$                                         | 0.005                            |
| actor/critic learning rate $l_\phi = l_\theta$ | 0.0001                           |
| $\lambda$ learning rate $l_\lambda$            | 0.0001                           |
| episode length                                 | 5000                             |
| batch size                                     | 100                              |
| test episodes                                  | 10                               |
| update freq. & grad.steps.                     | 50                               |
| exploration noise param.                       | 0.2                              |
| policy noise                                   | 0.2                              |
| noise clip.                                    | 0.5                              |
| replay buffer size                             | same as number of env. interacts |
| parameters specific for SPP-TD3                |                                  |
| $d$ state consistency                          | 0.2                              |
| CM hyper-parameters                            |                                  |
| init. rand. samples                            | 25000                            |
| learning rate                                  | 0.001                            |
| batch size                                     | 128                              |
| update frequency                               | 500 steps                        |
| update epochs                                  | 1                                |
| update batches                                 | 200                              |

Table 3: SPP-TD3 Algorithm hyperparameters for MuJoCo environments, TD3 used the same (common) hyperparameters.

| Hyperparameter                                 | Value                            |
|------------------------------------------------|----------------------------------|
| $\gamma$                                       | 0.99                             |
| $\tau$                                         | 0.005                            |
| actor/critic learning rate $l_\phi = l_\theta$ | 0.0002                           |
| $\lambda$ learning rate $l_\lambda$            | 0.0001                           |
| episode length                                 | 5000                             |
| batch size                                     | 100                              |
| test episodes                                  | 10                               |
| update freq. & grad.steps.                     | 50                               |
| exploration noise param.                       | 0.1                              |
| policy noise                                   | 0.2                              |
| noise clip.                                    | 0.5                              |
| replay buffer size                             | same as number of env. interacts |
| parameters specific for SPP-TD3                |                                  |
| $d$ state consistency                          | 0.2                              |
| CM hyper-parameters                            |                                  |
| init. rand. samples                            | 400000                           |
| learning rate                                  | 0.001                            |
| batch size                                     | 128                              |
| update frequency                               | 500 steps                        |
| update epochs                                  | 1                                |
| update batches                                 | 200                              |

Table 4: SPP-TD3 Algorithm hyperparameters for SafetyGym environments. Observe that for this environment specifically we used larger number of CM pretrain samples

| Hyperparameter                                 | Value     |
|------------------------------------------------|-----------|
| $\gamma$                                       | 0.99      |
| $\tau$                                         | 0.005     |
| actor/critic learning rate $l_\phi = l_\theta$ | 0.0001    |
| $\lambda$ learning rate $l_\lambda$            | 0.0001    |
| episode length                                 | 5000      |
| batch size                                     | 100       |
| test episodes                                  | 10        |
| update freq. & grad.steps.                     | 50        |
| exploration noise param.                       | 1         |
| policy noise                                   | 0.2       |
| noise clip.                                    | 0.5       |
| replay buffer size                             | 250000    |
| parameters specific for SPP-TD3                |           |
| $d$ state consistency                          | 0.2       |
| CM hyper-parameters                            |           |
| init. rand. samples                            | 100000    |
| learning rate                                  | 0.001     |
| batch size                                     | 128       |
| update frequency                               | 500 steps |
| update epochs                                  | 1         |
| update batches                                 | 200       |

Table 5: SPP-TD3 Algorithm hyperparameters for AntPush environment. Observe that for this environment specifically we used fixed buffer size which is significantly smaller than the total number of env interacts, and a much larger exploration noise param equal to 1.

| Hyperparameter                                 | Value               |
|------------------------------------------------|---------------------|
| $\gamma$                                       | 0.99                |
| $\tau$                                         | 0.005               |
| actor/critic learning rate $l_\phi = l_\theta$ | 0.001               |
| $\lambda$ learning rate $l_\lambda$            | 0.0001              |
| batch size                                     | 100                 |
| test episodes                                  | 10 each 1000 frames |
| update freq. & grad.steps.                     | 50                  |
| $\alpha$                                       | 0.2                 |
| $\alpha$ learning rate                         | 0.001               |
| replay buffer size                             | 1e6                 |
| parameters specific for SPP-SAC                |                     |
| $d$ state consistency                          | 0.2                 |
| CM hyper-parameters                            |                     |
| init. rand. samples                            | 10000               |
| learning rate                                  | 0.001               |
| batch size                                     | 100                 |
| update frequency                               | 1000 steps          |
| update batches                                 | 100                 |

Table 6: SPP-SAC Algorithm hyperparameters
